## Selective vulnerability of supragranular layer neurons in schizophrenia

Mykhailo Y. Batiuk<sup>1\*</sup>, Teadora Tyler<sup>2\*</sup>, Shenglin Mei<sup>3</sup>, Rasmus Rydbirk<sup>1</sup>, Viktor Petukhov<sup>1</sup>, Dora Sedmak<sup>4</sup>, Erzsebet Frank<sup>2</sup>, Virginia Feher<sup>2</sup>, Nikola Habek<sup>4</sup>, Qiwen Hu<sup>3</sup>, Anna Igoikina<sup>3,5</sup>, Lilla Roszik<sup>2</sup>, Ulrich Pfisterer<sup>1</sup>, Zdravko Petanjek<sup>4</sup>, Istvan Adorjan<sup>2†</sup>, Peter V. Kharchenko<sup>3†</sup>, Konstantin Khodosevich<sup>1†</sup>

<sup>1</sup>Biotech Research and Innovation Centre (BRIC), Faculty of Health and Medical Sciences, University of Copenhagen, 2200 Copenhagen, Denmark

<sup>2</sup>Department of Anatomy, Histology and Embryology, Semmelweis University, Budapest, Hungary

<sup>3</sup>Department of Biomedical Informatics, Harvard Medical School, Boston, Massachusetts, 02115, USA

<sup>4</sup>Croatian Institute for Brain Research & Center of Excellence for Basic, Clinical and Translational Neuroscience, School of Medicine, University of Zagreb, Zagreb, Croatia

<sup>5</sup>St. Petersburg Polytechnical University, St. Petersburg, Russia

\* authors have contributed equally

† correspondence should be addressed to: IA ([adorjan.istvan@med.semmelweis-univ.hu](mailto:adorjan.istvan@med.semmelweis-univ.hu)) PVK ([peter\\_kharchenko@med.harvard.edu](mailto:peter_kharchenko@med.harvard.edu)) and KK ([konstantin.khodosevich@bric.ku.dk](mailto:konstantin.khodosevich@bric.ku.dk))

## ABSTRACT

This version of the manuscript has been removed owing to inclusion of confidential information.
